# Supplementary material for: The conserved ATPase PCH-2 controls the number and distribution of crossovers by antagonizing their formation in Caenorhabditis elegans
Source: eLife. 2025 Feb 18;13:RP102409. doi: 10.7554/eLife.102409 (PMC11835387; doi:10.7554/eLife.102409)
Supplement: Figure 1—source data 1. [file elife-102409-fig1-data1.xlsx]

## Sheet: Sheet1
Chromosome I
PC in interval 4
pch-2			control			% wildtype
recombination in interval 1: 9/93			recombination in interval 1: 9/92
0.0967742			0.0978261			98.9247
recombination in interval 2: 7/93			recombination in interval 2: 14/92
0.0752688			0.152174			49.4624
recombination in interval 3: 15/93			recombination in interval 3: 13/92
0.16129			0.141304			114.144
recombination in interval 4: 25/93			recombination in interval 4: 24/92
0.268817			0.26087			103.047
non-recombinant			non-recombinant
0.397849			0.445652
no double crossovers			9 double crossovers
			6/9 at PC end
Chromosome III
PC in interval I
pch-2			control			% wildtype
recombination in interval 1: 33/93			recombination in interval 1: 43/133
0.354839			0.323308			109.752
recombination in interval 2: 1/93			recombination in interval 2: 13/133
0.0107527			0.0977444			11.0008
recombination in interval 3: 3/93			recombination in interval 3: 4/133
0.0322581			0.0300752			107.258
recombination in interval 4: 11/93			recombination in interval 4: 26/133
0.11828			0.195489			60.5045
non-recombinant			non-recombinant
0.462366			0.466165
0 double crossovers			13 double crossovers
			9/13 at PCs
Chromosome IV
PC in interval 4
pch-2			control			% wildtype
recombination in interval 1: 18/93			recombination in interval 1: 12/92
0.193548			0.130435			148.387
recombination in interval 2: 12/93			recombination in interval 2: 15/92
0.129032			0.163043			79.1398
recombination in interval 3: 3/93			recombination in interval 3: 3/92
0.0322581			0.0326087			98.9247
recombination in interval 4: 8/93			recombination in interval 4: 8/92
0.0860215			0.0869565			98.9247
non-recombinant			non-recombinant
0.55914			0.597826
no double crossovers			1 double crossover
			at PC end
X chromosome
PC in interval I
pch-2			control			% wildtype
recombination in interval 1: 19/92			recombination in interval 1: 14/92
0.206522			0.152174			135.714
recombination in interval 2: 7/92			recombination in interval 2: 10/92
0.076087			0.108696			70
recombination in interval 3: 11/92			recombination in interval 3: 13/92
0.119565			0.141304			84.6154
recombination in interval 4: 14/92			recombination in interval 4: 17/92
0.152174			0.184783			82.3529
non-recombinant			non-recombinant
0.445652			0.48913
no double crossovers			6 double crossovers
			4/6 at PC end
