# Supplementary material for: The conserved ATPase PCH-2 controls the number and distribution of crossovers by antagonizing their formation in Caenorhabditis elegans
Source: eLife. 2025 Feb 18;13:RP102409. doi: 10.7554/eLife.102409 (PMC11835387; doi:10.7554/eLife.102409)
Supplement: Figure 2—source data 1. [file elife-102409-fig2-data1.xlsx]

## Sheet: Figure2B
	GFP::COSA-1 counts
Genotype	Gonad		7 Foci	6 Foci	5 Foci	4 Foci	3 Foci	2 Foci	1 Foci
GFP::COSA-1	G1	Top	0	69	5	0	0	1	0
		Bottom	1	37	2	0	0	0	0
	G2	Top	0	53	1	0	0	0	0
		Bottom	0	51	3	0	0	0	0
	G3	Top	0	63	4	0	0	0	0
		Bottom	0	38	3	0	0	0	0
	G4	Top	0	70	3	1	0	0	0
		Bottom	0	39	2	0	0	0	0
pch-2; GFP::COSA-1	G1	Top	0	65	11	0	1	0	0
		Bottom	4	54	7	0	0	0	0
	G2	Top	3	52	10	6	1	1	0
		Bottom	0	39	6	0	0	0	0
	G3	Top	2	62	16	2	0	1	1
		Bottom	0	32	10	0	0	0	0
	G4	Top	0	82	8	0	1	0	0
		Bottom	0	66	9	0	0	0	0

## Sheet: Figure2D
	GFP::COSA-1 counts
Genotype	Gonad	0 Foci	1 Foci	2 Foci	3 Foci	4 Foci	5 Foci	6 Foci	7 Foci	8 Foci
COSA-1::GFP	1 – Top	0	0	0	0	0	3	12	4	1
	2 – Top	1	0	0	0	1	2	16	2	1
	2 – Bottom	0	0	0	0	1	1	15	0	0
	3 – Top	0	0	0	0	0	1	17	1	0
	3 – Bottom	0	0	0	0	0	1	19	0	0
	4 – Top	0	0	0	0	0	1	22	0	0
	4 – Bottom	0	0	0	0	0	1	20	0	0
	Total:	1	0	0	0	2	10	121	7	2
pch-2; GFP::COSA-1	1 – Top	0	0	0	0	1	1	11	2	0
	1 – Bottom	0	0	0	0	0	3	9	0	0
	2 – Top	1	0	0	0	0	2	14	0	0
	2 – Bottom	0	0	0	0	1	3	13	0	0
	3 – Top	1	0	0	0	1	3	18	0	0
	4 – Top	2	0	0	0	1	6	13	0	0
	5 – Top	0	0	0	0	0	7	11	1	0
	Total:	4	0	0	0	4	25	89	3	0

## Sheet: Figure2F
	GFP::COSA-1 counts
Genotype	Gonad	0 Foci	1 Foci	2 Foci	3 Foci	4 Foci	5 Foci	6 Foci	7 Foci	8 Foci
COSA-1::GFP	1 – Top	0	0	0	0	0	2	20	2	0
	1 – Bottom	0	0	0	0	0	1	17	0	0
	2 – Top	0	0	0	0	0	2	16	1	0
	2 – Bottom	0	0	0	0	0	0	14	1	0
	3 – Top	0	0	0	1	1	3	14	0	0
	3 – Bottom	0	0	0	0	0	0	12	0	0
	4 – Top	2	0	0	0	0	3	25	1	0
	4 – Bottom	2	0	0	0	0	3	16	0	0
	5 – Top	3	0	0	0	0	2	15	0	0
	Total:	7	0	0	1	1	16	149	5	0
pch-2; GFP::COSA-1	1 – Top	0	0	0	0	2	2	16	4	2
	1 – Bottom	0	0	0	0	1	3	15	2	0
	2 – Top	0	0	0	0	1	4	26	3	0
	2 – Bottom	0	0	0	0	3	3	11	1	0
	3 – Top	0	0	1	0	4	2	20	2	0
	3 – Bottom	0	1	1	0	0	4	8	1	0
	4 – Top	1	0	0	0	2	8	20	5	1
	4 – Bottom	0	0	0	0	1	6	13	0	0
	5 – Top	4	0	1	0	3	6	11	2	0
	5 – Bottom	2	0	0	0	0	6	13	3	1
	6 – Top	0	0	0	0	1	6	26	6	0
	6 – Bottom	0	0	0	0	0	2	10	3	0
	7 – Top	1	1	0	1	4	1	10	2	1
	9 – Top	2	0	1	0	0	4	13	7	1
	9 – Bottom	0	0	0	0	0	4	14	4	1
	Total:	10	2	4	1	22	61	226	45	7
