# Supplementary material for: The conserved ATPase PCH-2 controls the number and distribution of crossovers by antagonizing their formation in Caenorhabditis elegans
Source: eLife. 2025 Feb 18;13:RP102409. doi: 10.7554/eLife.102409 (PMC11835387; doi:10.7554/eLife.102409)
Supplement: Figure 3—source data 1. [file elife-102409-fig3-data1.xlsx]

## Sheet: Figure3C
Timepoint - 24 Hours Ethanol Control
Genotype	Germline	0	1	2	3	4	5	6	7	8	9	10	11	12
SPO-11::AID; GFP::COSA-1	G1 Top	1					1	17
	G1 Bot					1	2	15
	G2 Top	1					2	20
	G2 Bot
	G3 Bot	1					1	24
pch-2;spo-11::AID;GFP::COSA-1	G1 Top						2	20
	G1 Bot						1	23
	G2 Top						4	19
	G2 Bot							19
	G3 Top						3	23	1
	G3 Bot						3	24	1
Timepoint 1 – 36 hours on Auxin
Genotype	Germline	0	1	2	3	4	5	6	7	8	9	10	11	12
SPO-11::AID; GFP::COSA-1	G1 Top	14
	G1 Bot	12
	G2 Top	15
	G2 Bot	11
	G3 Top	13
	G3 Bot	13
pch-2;spo-11::AID;GFP::COSA-1	G1 Top	12
	G1 Bot	10
	G2 Top	17
	G2 Bot	13
	G3 Top	15
	G3 Bot	16
Timepoint 2 – 24 hours on Auxin
Genotype	Germline	0	1	2	3	4	5	6	7	8	9	10	11	12
SPO-11::AID; GFP::COSA-1	G1 Top	10	6		1		2	1
	G1 Bot			1	3	1	3	8	1
	G2 Top	16	3	1	1			2
	G2 Bot	12	5	4	1	1		1
	G3 Top	11	4	2	2	1		5
	G3 Bot	11	3	4	2	1	1	1
pch-2;SPO-11::AID; GFP::COSA-1	G1 Top	13	3	1			1	2
	G1 Bot	10	4	2	2		3	3
	G2 Top	18	4	1		1	3	7
	G2 Bot	10	2	2	3	1	2	5	1
	G3 Top	6	2	7	1	2	2	1
	G3 Bot	13	7	5	1	1		3
Timepoint 3 – Auxin for 22 hours
Genotype	Germline	0	1	2	3	4	5	6	7	8	9	10	11	12
SPO-11::AID; GFP::COSA-1	G1 Top	15	3	2	1		1	3
	G1 Bot	14	6	3			1	3
	G2 Top			5	3	6	4	5
	G2 Bot		1	2				10
	G3 Top	2					2	14	1
	G3 Bot	6		1		1	3	4	1
	G4 Top				1			15
	G4 Bot				1		2	10
pch-2;SPO-11::AID; GFP::COSA-1	G1 Top	19	2	3				3
	G1 Bot	10	2	2	2	1	2	4
	G2 Top	1		3	2	3	3	14	1
	G2 Bot			1	1		1	10	4
	G3 Top	7	3	1	4		2	10	1
	G3 Bot		1	1		1	2	12	1
	G4 Top	3				1		12
	G4 Bot	4			1		1	5		1
Timepoint 4 – Auxin for 20 hours
Genotype	Germline	0	1	2	3	4	5	6	7	8	9	10	11	12
SPO-11::AID; GFP::COSA-1	G1 Top							25
	G1 Bot	1						18
	G2 Top					1	1	19	1
	G2 Bot				1			12
	G3 Top					1	5	12
	G3 Bot	1			1	1	1	10	1
	G4 Top					1		13	1
	G4 Bot							11	1
pch-2;SPO-11::AID; GFP::COSA-1	G1 Top				1			22	4
	G1 Bot					2	1	18	2
	G2 Top			1	1	1	1	17	1
	G2 Bot			2	1		3	9	1
	G3 Top				2		4	12	1
	G3 Bot					1	1	11	1
	G4 Top	1			1		2	14	2
	G4 Bot			3	1			8	4
Timepoint 5 – Auxin for 18 hours
Genotype	Germline	0	1	2	3	4	5	6	7	8	9	10	11	12
SPO-11::AID; GFP::COSA-1	G1 Top	1				1	2	20
	G1 Bot							17	2
	G2 Top						1	17	2
	G2 Bot							15
	G3 Top	1			1	1	1	20
	G3 Bot						4	9	2
	G4 Top					2		20
	G4 Bot							14	1
pch-2;SPO-11::AID; GFP::COSA-1	G1 Top							17	2
	G1 Bot							15	1	1
	G2 Top					3	1	15
	G2 Bot	1	1		2	2	2	5	1
	G3 Top							23
	G3 Bot							19	3
	G4 Top					1	2	20	2
	G4 Bot							14	1

## Sheet: Figure3D
Timepoint Control – Ethanol for 36 hours
Genotype	Germline	0	1	2	3	4	5	6	7	8	9	10	11	12
spo-11::AID;GFP::COSA-1	1							4
	2							5
	3							4
	4							4
	5							6
	6							5
	7							4
	8							4
	9							4
	10							4
	11							4
	12							4
pch-2;spo-11::AID;GFP::COSA-1	1							3	1
	2							3
	3							3	1
	4							2	1
	5							4
	6							4
	7							2	1
	8							3
	9							4
	10							4
	11							4
	12							4
	13							4
Timepoint 2 – Auxin for 36 hours
Genotype	Germline	0	1	2	3	4	5	6	7	8	9	10	11	12
spo-11::AID;GFP::COSA-1	1												3	1
	2												2	3
	3													4
	4												1	3
	5													4
	6												1	2
	7							1	2
	8							2	1			1
	9									1			1	2
	10													4
	11								1		1		2
	12							1				1	1
pch-2;spo-11::AID;GFP::COSA-1	1											2	1	1
	2												1	2
	3											1	1	2
	4												1	3
	5									1		1	1	1
	6										1	1	1
	7							4
	8							2		1			1
	9								1		1	1		1
	10								2		1	1
	11							2				1		1
	12							1				2		1
	13											3	1
Timepoint 3 – Auxin for 34 hours
Genotype	Germline	0	1	2	3	4	5	6	7	8	9	10	11	12
spo-11::AID;GFP::COSA-1	1											1	2	1
	2										2		2
	3							4
	4							3
	5													5
	6							1		1		1	1
	7							2	1				1
	8									2		1		1
	9							2					1
	10													2
	11									1			2	1
pch-2;spo-11::AID;GFP::COSA-1	1							5
	2							3
	3											1	2	1
	4											1	3
	5											2	2
	6									1		2	1
	7										1	1	1	1
	8							4
	9							2			1	1
	10							1	1		1	1		1
Timepoint 4 – Auxin for 32 hours
Genotype	Germline	0	1	2	3	4	5	6	7	8	9	10	11	12
spo-11::AID;GFP::COSA-1	1									1	2	1	1
	2							2			1			1
	3											2	1	1
	4							1					1	2
	5							3		1		1
	6										1		1	3
	7							4
	8							2		1				1
	9													4
	10							4
	11							4
	12							4
pch-2;spo-11::AID;GFP::COSA-1	1							4
	2							4
	3							2			1	1
	4							3	1
	5							4
	6							4
	7							2	1			1
	8							3
	9							4
	10							3						1
	11											1		3
	12								2		1			1
Timepoint 5 – Auxin for 30 hours
Genotype	Germline	0	1	2	3	4	5	6	7	8	9	10	11	12
spo-11::AID;GFP::COSA-1	1							5
	2							3	1
	3							3			1			1
	4							3	2
	5							5
	6							3					2
	7							5
	8								1	1	1			1
	9							4
	10							4
pch-2;spo-11::AID;GFP::COSA-1	1							1	1
	2							2	2					1
	3							3	2
	4							4
	5							5
Timepoint 1 – Auxin for 48 hours
Genotype	Germline	0	1	2	3	4	5	6	7	8	9	10	11	12
spo-11::AID;GFP::COSA-1	1													5
	2													5
	3													4
	4													4
	5													4
	6													4
	7													4
	8													5
	9													4
	10													4
	11													4
pch-2;spo-11::AID;GFP::COSA-1	1													4
	2													5
	3													5
	4													4
	5													5
	6													5
	7													5
	8													5
	9													5
