# Supplementary material for: The conserved ATPase PCH-2 controls the number and distribution of crossovers by antagonizing their formation in Caenorhabditis elegans
Source: eLife. 2025 Feb 18;13:RP102409. doi: 10.7554/eLife.102409 (PMC11835387; doi:10.7554/eLife.102409)
Supplement: Figure 4—source data 1. [file elife-102409-fig4-data1.xlsx]

## Sheet: Figure4B
wildtype germline
Row (starting TZ)	MSH-5 foci in nuclei							Row Average
1	1	2	2	3	3	4	4	2.71429
2	3	3	4	4	4	7	8	4.71429
3	7	8	8	9	10			8.4
4	4	5	6	7	8			6
5	6	7	9	13	13			9.6
6	6	10	10	12	15	16	16	12.1429
7	10	10	12	14	15			12.2
8	12	15	15	16	17			15
9	11	11	16	16	17			14.2
10	12	14	15	15				14
11	13	13	14	20				15
12	14	14	14	16	17	24		16.5
13	17	18	19	21	21	26		20.3333
14	11	13	13	14	15	15	16	13.8571
15	11	15	17	17	17	19		16
16	13	15	17	18	21			16.8
17	12	13	18	18	18	19		16.3333
18	8	11	12	12	13			11.2
19	11	11	12	13	14	14		12.5
20	9	10	10	12	13	14	14	11.7143
21	11	11	12	12				11.5
22	8	8	9	9	12			9.2
23	9	9	9					9
24	6	7	7	8	8	9	10	7.85714
25	6	6	6	8	9			7
26	6	7	7	8	8	9		7.5
27	5	6	8	9				7
28	7	7	7	8				7.25
29	4	6	7	7	7			6.2
30	5	6	6	6				5.75
31	7	7	8					7.33333
pch-2 germline
Row (starting TZ)	MSH-5 foci in nuclei									Row Average
1	4	8	8	9	9	9	11	12	14	9.33333
2	8	10	10	14	16					11.6
3	10	12	13	14	16	22				14.5
4	9	10	12	12	13					11.2
5	12	14	17	20						15.75
6	11	13	13	14	16					13.4
7	5	8	9	10	10	11	13			9.42857
8	11	11	12	15	18	19				14.3333
9	10	13	14	16	17	17	20			15.2857
10	15	15	15	17	18	20				16.6667
11	14	18	19	19	19	20				18.1667
12	8	10	12	19	20					13.8
13	13	14	16	17	19					15.8
14	14	15	15	16	19	21	23			17.5714
15	14	17	18	19	19	20	21			18.2857
16	19	19	20	21	23					20.4
17	15	16	16	18	19	25				18.1667
18	13	17	17	18	20	21	26			18.8571
19	15	19	19	21	23	25				20.3333
20	15	18	19	19	24	24	27			20.8571
21	10	13	15	17	18	19	20	28		17.5
22	17	17	19	21	23	24				20.1667
23	14	16	19	21	24	24	25			20.4286
24	11	16	17	18	22	27				18.5
25	18	20	20	21	25					20.8
26	17	18	19	22	23	24				20.5
27	13	13	14	15	15	16				14.3333
28	12	14	15	16	18					15
29	15	17	18	24						18.5
30	15	16	21	22						18.5
31	12	13	18							14.3333
32	8	9	9	12						9.5
33	6	8	8	15						9.25
34	9	10	11							10
35	11	12	13							12

## Sheet: Figure4D
him-3 germline
Row (Starting TZ)	MSH-5 Foci in nuclei									Row Average
1	9	10	11	12	13	13	13	15	15	12.3333
2	11	14	14	14						13.25
3	17	19	20	20						19
4	17	19	20	21	24					20.2
5	15	15	16	19	24					17.8
6	15	19	19	20						18.25
7	6	13	16	16	17					13.6
8	12	19	20	20						17.75
9	16	17	19	21	21					18.8
10	11	18	23	24	25					20.2
11	13	18	19	21	23					18.8
12	26	27	28	29						27.5
13	20	23	24	26						23.25
14	21	24	30	31						26.5
15	25	29	30	33						29.25
16	22	22	29	31	35					27.8
17	25	26	27	28						26.5
18	20	26	30	32						27
19	22	26	29	29	30					27.2
20	19	24	27	33	41					28.8
21	16	28	31	35	39	42				31.8333
22	24	24	34	34	40					31.2
23	26	29	34	34	34	37	37			33
24	23	35	36	37	37					33.6
25	28	30	36	36	37	39				34.3333
26	27	32	32	33	35					31.8
27	30	34	36	38	38					35.2
28	24	31	36	38	42					34.2
29	19	27	34	37	38					31
30	22	29	30	34	43					31.6
31	30	30	33	40	42					35
32	25	32	32	37						31.5
33	27	28	29	30	35					29.8
34	16	20	23	25	30	30	31	32	33	26.6667
35	14	22	24							20
36	14	22								18
37	15	18	20	22						18.75
38	15	19	23							19
pch-2;him-3 germline
Row (Starting TZ)	MSH-5 Foci in nuclei							Row Average
1	3	4	4	4				3.75
2	5	10	11					8.66667
3	5	6	7	11	11			8
4	6	8	9	12	13			9.6
5	4	6	9	9	10	11		8.16667
6	9	9	11	12	12	13	13	11.2857
7	8	8	12	12	13			10.6
8	9	9	13	15	15	15		12.6667
9	13	14	15	16				14.5
10	15	16	16	16	17	21		16.8333
11	6	14	17	17	18			14.4
12	15	20	20	22	24			20.2
13	20	20	21	22	23			21.2
14	18	19	21	22				20
15	17	18	19	22				19
16	10	16	16	17	20			15.8
17	15	17	17	18	18			17
18	17	20	22	24	24			21.4
19	20	21	27	28				24
20	21	24	24	27				24
21	22	24	27	28				25.25
22	17	20	21	21	22			20.2
23	19	21	23	31				23.5
24	18	21	21	24	26			22
25	17	20	22	25	25			21.8
26	17	18	18	19	28			20
27	17	17	19	22				18.75
28	12	14	18	18	19			16.2
29	16	17	18					17
30	15	15	15	19	21			17
31	4	16	17	21				14.5
32	11	12	14	19				14
33	8	9	10	11				9.5
34	10	11	13					11.3333
35	11	12	13					12
36	8	8	11					9
wildtype germline
Row (Starting TZ)	MSH-5 Foci in nuclei											Row Average
1	1	1	1	2	2	3	3	3	3	3	4	2.36364
2	2	2	3	3	4	5						3.16667
3	2	4	4	6	6							4.4
4	3	3	5	5	7							4.6
5	4	5	5	6	6	6						5.33333
6	4	4	5	5	5	6						4.83333
7	3	6	7	7	12							7
8	5	7	8	9	12	14						9.16667
9	9	11	13	13	17							12.6
10	8	13	15	15								12.75
11	9	10	13	13	14	17						12.6667
12	11	11	11	12	12	12	12	13	14			12
13	10	10	11	13	13	14	15	17				12.875
14	11	13	15	16	20	23						16.3333
15	10	12	16	16	16	17						14.5
16	8	12	14	15	18							13.4
17	12	14	15	17	17	21						16
18	11	13	15	16	17	18	19	20				16.125
19	14	17	18	19	21							17.8
20	8	15	17	18	18	19	19	21				16.875
21	17	18	18	20	20	21	23	27				20.5
22	15	16	16	19	20	21	21	22				18.75
23	13	16	20	23	23	24						19.8333
24	15	19	20	22								19
25	10	12	13	14	15	15	16	16	17			14.2222
26	10	10	13	16	22							14.2
27	11	12	13	14	15	15	16					13.7143
28	14	16	19	19	21	22	22					19
29	12	14	15	20								15.25
30	13	13	14	17	20							15.4
31	10	12	12	14	15	17						13.3333
32	10	10	11	12	13	14	15					12.1429
33	11	16	18									15
34	7	9	13	14								10.75
35	8	9	11									9.33333
36	6	7	7	8								7
37	4	7	9									6.66667
38	8	11										9.5
39	6	8	10	11								8.75
40	3	4	5	6								4.5
41	6	6	7	9								7
42	5	6	7									6

## Sheet: Figure4F
wildtype germline											average COSA-1												average MSH-5
Row 5	5	6	6	6	6	6	6				5.85714		6	7	7	8	6	6	7				6.71429
Row 4	6	6	6	6	6	6					6		7	7	7	6	7	7					6.83333
Row 3	6	6	6	6	6	6	6				6		6	8	8	10	6	7	8				7.57143
Row 2	5	6	6	5	6	6	6	6			5.75		6	7	13	6	8	8	9	9			8.25
Row 1	6	6	6	4	6	6	6	6			5.75		7	8	10	6	6	7	9	10	11		8.22222
											5.86111												7.59459
pch-2 germline
Row 5	6	6	6	5	6	6					5.83333		7	13	15	6	7	10					9.66667
Row 4	5	6	6	6	5	5	6	6	6	6	5.7		8	9	10	10	6	7	7	8	9	11	8.5
Row 3	6	6	6	6	6	4	5	5	6		5.55556		7	8	8	10	10	7	8	9	11		8.66667
Row 2	3	5	6	6	6	5	5	6	6	6	5.4		6	8	8	10	12	6	8	8	10	11	8.7
Row 1	3	4	4	5	5	6	6	6	6	6	5.1		9	12	13	13	15	15	7	7	8	9	10.8

## Sheet: Figure4G
less than 6 COSA-1 foci		MSH-5 foci
Genotype		0	1	2	3	4	5	6	7	8	9	10	11	12	13	14	15
wt G1									2
wt G2									1		1
pch2 g2											2	1		1	2		2
pch2 g3										2	2	2	1
pch2 g1								3		1	1
six COSA-1 foci		MSH-5 foci
Genotype		0	1	2	3	4	5	6	7	8	9	10	11	12	13	14	15
wt G1								3	5	4		2			1
wt G2								7	4	3	2	1	1
pch2 g2								1	2	5		4		1	1		1
pch2 g3								3	6	2	1		2
pch2 g1								1	2	3		1		1

## Sheet: Figure 4-supplement 1
htp-3 germline
Row (Starting TZ)	MSH-5 Foci in nuclei								Row Average
1	6	8	11	11					9
2	5	10	10	10	11				9.2
3	7	8	9	10	20	21			12.5
4	8	11	14	15	20				13.6
5	15	18	19						17.3333
6	19	20	23	24	24				22
7	19	20	21	23	24	29	31	32	24.875
8	11	20	23	23	24	30			21.8333
9	18	21	21	22					20.5
10	17	17	17	21	23	23	23	25	20.75
11	21	21	22	24	26	30			24
12	22	27	29	29					26.75
13	20	28	28	40					29
14	18	20	24	28	35				25
15	18	19	28	29	30				24.8
16	23	25	28	33					27.25
17	26	26	30						27.3333
18	22	25	28	30	32				27.4
19	18	21	21	22	22				20.8
20	17	20	20						19
21	19	20	22						20.3333
22	12	14	17						14.3333
23	11	17	19	22					17.25
24	12	17	17	21					16.75
25	12	13	17	19					15.25
26	12	15	15	16					14.5
27	10	12	13						11.6667
28	7	11	14						10.6667
29	8	13	17						12.6667
30	12	14	15						13.6667
pch-2;htp-3 germline
Row (Starting TZ)	MSH-5 Foci in nuclei									Row Average
1	5	7	9	11	11					8.6
2	6	10	12	13						10.25
3	9	11	14							11.3333
4	10	11	11	17						12.25
5	9	9	9	14	16	17				12.3333
6	6	8	11	13	17	18				12.1667
7	11	16	16	20						15.75
8	16	17	21							18
9	16	16	17	19	22	24				19
10	13	17	17	18	20	25				18.3333
11	17	20	21	22						20
12	20	22	22	25	25	25				23.1667
13	19	21	22	25						21.75
14	19	20	24							21
15	23	24	27							24.6667
16	26	27	29	30	31	40				30.5
17	21	23	27	31	33	37	40			30.2857
18	26	26	31	40						30.75
19	23	24	25	29	30					26.2
20	19	21	24	32	34					26
21	22	23	25	27	28					25
22	12	22	27	30	33					24.8
23	21	27	28	29						26.25
24	25	27	28	29						27.25
25	18	20	23	24	24					21.8
26	20	22	22	23	24					22.2
27	18	23	24	24						22.25
28	19	19	22	23	30					22.6
29	12	15	18	19						16
30	15	18	19	21						18.25
31	18	19	19	20						19
32	15	16	16	18	26					18.2
33	12	15	17	20						16
34	7	10	11	12	13	14	14	14	16	12.3333
wildtype germline
Row (starting TZ)	MSH-5 foci in nuclei							Row Average
1	1	2	2	3	3	4	4	2.71429
2	3	3	4	4	4	7	8	4.71429
3	7	8	8	9	10			8.4
4	4	5	6	7	8			6
5	6	7	9	13	13			9.6
6	6	10	10	12	15	16	16	12.1429
7	10	10	12	14	15			12.2
8	12	15	15	16	17			15
9	11	11	16	16	17			14.2
10	12	14	15	15				14
11	13	13	14	20				15
12	14	14	14	16	17	24		16.5
13	17	18	19	21	21	26		20.3333
14	11	13	13	14	15	15	16	13.8571
15	11	15	17	17	17	19		16
16	13	15	17	18	21			16.8
17	12	13	18	18	18	19		16.3333
18	8	11	12	12	13			11.2
19	11	11	12	13	14	14		12.5
20	9	10	10	12	13	14	14	11.7143
21	11	11	12	12				11.5
22	8	8	9	9	12			9.2
23	9	9	9					9
24	6	7	7	8	8	9	10	7.85714
25	6	6	6	8	9			7
26	6	7	7	8	8	9		7.5
27	5	6	8	9				7
28	7	7	7	8				7.25
29	4	6	7	7	7			6.2
30	5	6	6	6				5.75
31	7	7	8					7.33333
