# Supplementary material for: The conserved ATPase PCH-2 controls the number and distribution of crossovers by antagonizing their formation in Caenorhabditis elegans
Source: eLife. 2025 Feb 18;13:RP102409. doi: 10.7554/eLife.102409 (PMC11835387; doi:10.7554/eLife.102409)
Supplement: Figure 5—source data 1. [file elife-102409-fig5-data1.xlsx]

## Sheet: Figure5B
		PCH-2 nuclei counts
dsb-2;GFP::COSA-1 (24 Hours Post L4)	PCH-2 nuclei	0 Foci	1 Foci	2 Foci	3 Foci	4 Foci	5 Foci	6 Foci
	Postive	13	2	2	7	11	7	1
	Negative	8	16	37	45	29	32	27
dsb-2;GFP::COSA-1 (48 Hours Post L4)	PCH-2 nuclei	0 Foci	1 Foci	2 Foci	3 Foci	4 Foci	5 Foci	6 Foci
	Postive	39	1	2	0	0	0	0
	Negative	31	33	40	20	6	0	0

## Sheet: Figure5D
		COSA-1 counts
Genotype	Germline	0	1	2	3	4	5	6
dsb-2::AID;GFP::COSA-1	G1 Top						1	19
Ethanol	G1 Bot							15
	G2 Top							19
	G2 Bot							15
	G3 Top	1						16
	G3 Bot							15
pch-2;dsb-2::AID;GFP::COSA-1	G1 Top	1					1	18
Ethanol	G1 Bot						2	17
	G2 Top							18
	G2 Bot						2	14
	G3 Top							22
	G3 Bot						3	14
	G4 Top							22
	G4 Bot						1	19
		COSA-1 counts
Genotype	Germline	0	1	2	3	4	5	6
dsb-2::AID;GFP::COSA-1	G1 Top		1	2	2	3	3	7
Auxin	G1 Bot	1		4	3	6	1	3
	G2 Top		1	3	4	4	3	8
	G2 Bot			1	3	4	5	2
	G3 Top		1	4	7	3	4	3
	G3 Bot		1	1	1	6	7	3
pch-2;dsb-2::AID;GFP::COSA-1	G1 Top			2	6	2	7	3
Auxin	G1 Bot	2		3	2	6	6	4
	G2 Top			9	5	4	4	2
	G2 Bot		1	1	6	8	3
	G3 Top	3	2	7	2	5	3	4
	G3 Bot		2	3	4	5	4	1
