# Supplementary material for: The conserved ATPase PCH-2 controls the number and distribution of crossovers by antagonizing their formation in Caenorhabditis elegans
Source: eLife. 2025 Feb 18;13:RP102409. doi: 10.7554/eLife.102409 (PMC11835387; doi:10.7554/eLife.102409)
Supplement: Figure 6—source data 1. [file elife-102409-fig6-data1.xlsx]

## Sheet: Figure6C
	GFP::COSA-1 counts
Genotype	Gonad	0 Foci	1 Foci	2 Foci	3 Foci	4 Foci	5 Foci	6 Foci	7 Foci	8 Foci	9 Foci
COSA-1::GFP	G1 Top	0	0	0	0	0	3	19	0	0	0
	G1 Bot	0	0	0	0	0	3	20	0	0	0
	G2 Top	0	0	0	0	0	2	13	0	0	0
	G2 Bot	3	0	0	0	0	0	15	0	0	0
	G3 Top	0	0	0	0	0	2	19	0	0	0
	G3 Bot	0	0	0	0	0	2	18	0	0	0
	G4 Top	0	0	0	0	1	1	15	0	0	0
	G4 Bot	0	0	0	0	0	0	18	0	0	0
pch-2; GFP::COSA-1	G1 Top	0	0	0	0	1	4	10	0	0	0
	G1 Bot	0	0	0	0	0	1	5	0	0	0
	G2 Top	0	0	0	0	1	2	11	0	0	0
	G2 Bot	0	0	0	2	2	5	9	0	0	0
	G3 Top	0	0	0	0	1	4	15	0	0	0
	G3 Bot	0	0	1	0	0	2	13	0	0	0
	GFP::COSA-1 counts
Genotype	Gonad	0 Foci	1 Foci	2 Foci	3 Foci	4 Foci	5 Foci	6 Foci	7 Foci	8 Foci	9 Foci
syp-1(T452A);GFP::COSA-1	G1 Top	5	0	1	2	2	0	7	1	1	0
	G1 Bot	4	0	0	0	0	0	9	0	0	0
	G2 Top	13	7	0	0	0	0	0	2	0	0
	G2 Bot	13	0	0	0	0	0	4	0	0	0
	G3 Top	19	0	0	0	1	0	7	0	0	0
	G3 Bot	11	2	0	0	1	1	7	1	0	0
	G4 Top	12	2	1	0	0	3	6	2	0	0
	G4 Bot	4	0	0	0	0	1	8	4	0	0
	G5 Top	10	0	1	0	0	3	5	2	0	0
	G5 Bot	11	1	0	0	1	3	2	2	0	0
	G6 Top	10	1	1	0	1	0	5	1	0	0
	G6 Bot	11	0	0	0	0	3	8	0	0	1
pch-2;syp-1(T452A);GFP::COSA-1	G1 Top	5	0	2	0	0	0	8	4	1	0
	G1 Bot	0	1	0	0	1	2	7	1	0	0
	G2 Top	5	0	1	0	1	5	7	4	0	0
	G2 Bot	0	0	0	0	2	1	6	0	0	0
	G3 Top	2	0	1	0	1	3	7	3	1	0
	G3 Bot	0	0	0	0	0	1	10	5	1	0
	G4 Top	0	0	0	0	0	2	6	7	0	0
	G4 Bot	0	0	0	0	0	2	0	1	2	0
	G5 Top	1	0	0	0	0	2	16	2	1	0
	G5 Bot	1	0	0	0	0	1	14	3	0	0
	G6 Top	6	1	0	0	0	1	11	1	0	0
	G7 Top	3	1	0	0	4	1	9	2	2	0
	G7 Bot	1	1	0	0	2	3	5	0	0	0
	G8 Top	2	0	0	0	1	5	7	0	0	0
	G8 Bot	2	0	2	0	0	4	4	1	0	0

## Sheet: Figure6E
		DAPI Bodies
Genotype	Gonad	0	1	2	3	4	5	6	7	8	9	10	11	12
wildtype	1							2
	2							6
	3							8
	4							10
	5							8
	6							6
	7							14
Genotype	Gonad	0	1	2	3	4	5	6	7	8	9	10	11	12
pch-2	1							7
	2							7	1
	3							8	1
	4							7	1
	5							2	1
	6							3	1
	7							2
	8							4	1
	9							4
	Gonad
syp-1(T452A);GFP::COSA-1	1							2	1	1	1
	2								1	2	1	1
	3							4
	4								1	3	1
	5								3	1		1
	6							4
	7							1	2	1	1
	8							4
	9							2	2
	Gonad
pch-2;syp-1(T452A);GFP::COSA-1	1							4
	2							6
	3							5
	4							4
	5							5
	6							4	1
	7							4	1
	8							4
	9							6

## Sheet: Figure 6-supplement 1
	Image	Row		Notes				Genotype	Image	Row		Notes				Genotype	Image	Row	Notes
syp-1T452A - G1	1	1						syp-1T452A - G2	1	1						syp-1T452A - G3	1	1
		2								2								2
		3								3								3
		4								4								4
		5								5								5
		6								6								6
		7								7								7
		8		Mitotic Nuclei end						8								8
	2	9		TZ starts						9								9
		10								10								10
		11								11								11
		12								12								12
		13								13							2	13	TZ zone starts
		14							2	14								14
		15								15								15
		16								16								16
		17								17								17
		18								18								18
		19								19		All mitotic rows till here						19
		20								20		Start of the TZ						20
		21								21								21
		22		Last few rows crescent shaped nuclei less prevalent					3	22								22
	3	23								23							3	23
		24								24								24
		25								25								25
		26								26								26
		27								27								27
		28								28								28
		29								29								29
		30								30								30
		31		Still seeing crescent shaped nuclei						31								31
	4	32								32		Last few rows look less TZ like but still have crescent shaped nuclei						32
		33							4	33								33	Last few rows have less TZ looking nuclei
		34								34							4	34
		35								35								35
		36								36								36
		37								37								37
		38								38								38
		39								39								39
		40		TZ looking nuclei end						40								40
	5	41								41							5	41	TZ looking nuclei end
		42							5	42								42
		43								43								43
		44								44								44
		45		71% TZ						45								45
				63% average						46								46	63% TZ
									6	47
										48
										49
										50
										51
										52
										53		TZ looking nuclei end
										54
										55
									7	56
										57
										58
										59
										60		56% TZ
Genotype	Image	Row	Notes
pch-2;syp-1T452A G1	Image 1	1
		2
		3
		4
		5
		6
		7
		8
		9	Start of TZ
		10
		11
		12
		13
		14
	Image 2	15
		16
		17
		18
		19
		20
		21
		22
		23
	Image 3	24
		25
		26
		27
		28
		29
		30
	Image 4	31
		32
		33	Last Row with TZ looking nuclei
		34
		35
		36	69% TZ
Genotype	Image	Row	Notes
pch-2;syp-1T452A G2	Image 1	1
		2
		3
		4
		5
		6
		7
		8
		9
		10
		11
		12
		13
	Image 2	14
		15	Start of the TZ
		16
		17
		18
		19
		20
		21
	Image 3	22
		23
		24
		25
		26
		27
		28
		29
		30
		31
		32
		33
	Image 4	34
		35
		36
		37
		38
		39
		40
		41
		42
		43
		44
		45
		46
	Image 5	47
		48
		49
		50
		51	Last row with TZ looking nuclei
		52
		53
		54
		55
		56	68% TZ
Genotype	Image	Row
pch-2;syp-1T452A G4	Image 1	1
		2
		3
		4
		5
		6
		7
		8
		9
		10
		11
		12
	Image 2	13	Start of the TZ
		14
		15
		16
		17
		18
		19
		20
		21
		22
		23
	Image 3	24
		25
		26
		27
		28
		29
		30
		31
		32
	Image 4	33
		34	Last row with TZ looking nuclei
		35
		36
		37
	Image 5	38
		39
		40	55% TZ
			64% average TZ
			63% average TZ in syp-1
